# Supplementary material for: CD49a Regulates Cutaneous Resident Memory CD8+ T Cell Persistence and Response
Source: PubMed Central journal article supplement — Cell Rep. Author manuscript; Available in PMC 2020 Sep 28. (PMC7520726; doi:10.1016/j.celrep.2020.108085), 2020-09-01
Supplement: NIHMS1627846-supplement-1.pdf [file NIHMS1627846-supplement-1.pdf]

**Cell Reports, Volume 32**

**Supplemental Information**

**CD49a Regulates Cutaneous Resident**

**Memory CD8<sup>+</sup> T Cell Persistence and Response**

**Shannon K. Bromley, Hasan Akbaba, Vinidhra Mani, Rut Mora-Buch, Alexandra Y. Chasse, Andrea Sama, and Andrew D. Luster**

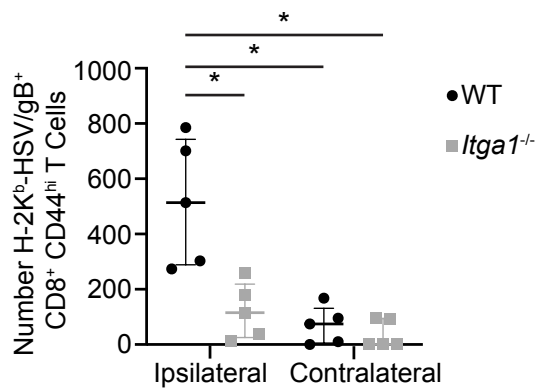

**Supplementary Figure 1.** WT or *Itga1*<sup>-/-</sup> mice were infected with HSV-KOS. Numbers of HSV-gB/K<sup>b</sup> CD8<sup>+</sup> CD44<sup>hi</sup> T cells recovered from the ipsilateral or contralateral skin of WT versus *Itga1*<sup>-/-</sup> mice 30 days post-infection. \**p*<0.05, two tailed Mann-Whitney t-test. Related to Figure 1A.

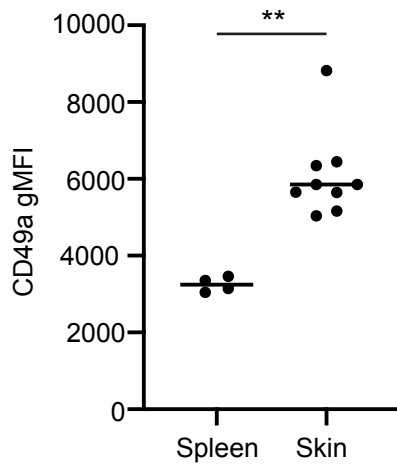

**Supplementary Figure 2.** Geometric mean fluorescence intensity (gMFI) of CD49a staining of OT-I T cells recovered from the spleen 9 days after i.v. transfer, and from the skin 9 days after i.d. transfer. \*\* $p < 0.005$ , two-tailed Mann-Whitney t-test. Related to Figure 2C.

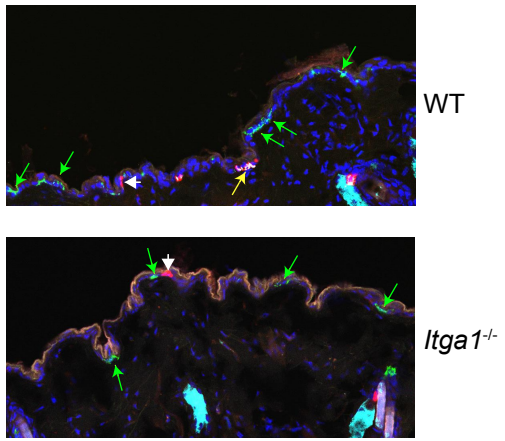

**Supplementary Figure 3.**  $5 \times 10^4$  WT CD45.2<sup>+</sup> OT-I CD8<sup>+</sup> T cells or  $5 \times 10^4$  *Itga1<sup>-/-</sup>* CD45.2<sup>+</sup> OT-I CD8<sup>+</sup> T cells were adoptively transferred into CD45.1<sup>+</sup> recipient mice. Histological cross-sections of a 1 cm<sup>2</sup> area of flank skin surrounding the initial HSV-infection sites. Yellow arrows indicate CD45.2<sup>+</sup> OT-I T cells; white arrowheads indicate endogenous CD8<sup>+</sup> T cells; green arrows indicate  $\gamma\delta$  T cells. Related to Figure 5A.



Epidermis

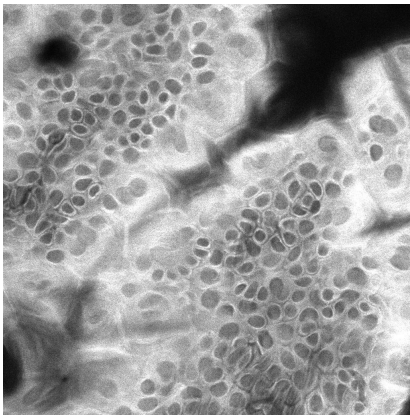

Dermis/Epidermis

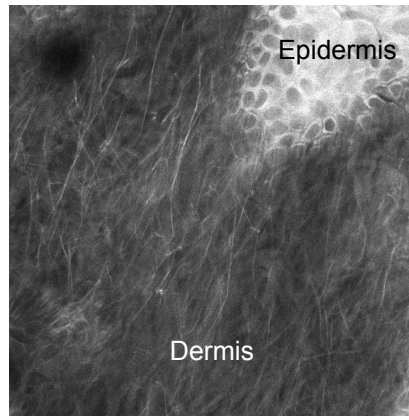

Dermis

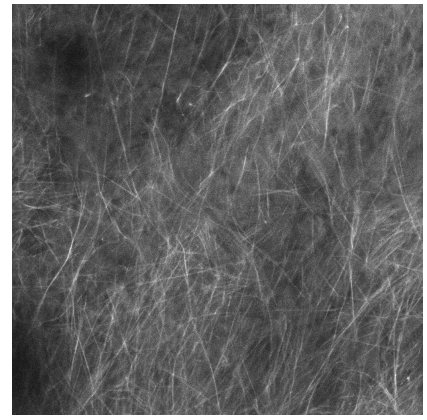

**Supplementary Figure 4.** Representative images of whole-mount skin autofluorescence excited at 633 nm. Left image illustrates epidermis; middle image illustrates transitioning from the epidermis (upper right) to dermis; right image illustrates dermis. Related to Figures 5D, 5E.
